# Supplementary material
Source: MDPI journal article supplement (https://www.mdpi.com/2073-4352/12/12/1802)

## checkCIF/PLATON report

Structure factors have been supplied for datablock(s) ab\_si\_002\_01\_sq\_sq\_sq, jw1119\_01, jw1121\_01, saku001\_03

THIS REPORT IS FOR GUIDANCE ONLY. IF USED AS PART OF A REVIEW PROCEDURE FOR PUBLICATION, IT SHOULD NOT REPLACE THE EXPERTISE OF AN EXPERIENCED CRYSTALLOGRAPHIC REFEREE.

No syntax errors found.      CIF dictionary      Interpreting this report

### Datablock: ab\_si\_002\_01\_sq\_sq\_sq

---

|                        |                                 |                                   |
|------------------------|---------------------------------|-----------------------------------|
| Bond precision:        | C-C = 0.0025 A                  | Wavelength=0.71073                |
| Cell:                  | a=12.1634 (6)                   | b=17.0246 (10)      c=11.4268 (7) |
|                        | alpha=90                        | beta=101.450 (4)      gamma=90    |
| Temperature:           | 200 K                           |                                   |
|                        | Calculated                      | Reported                          |
| Volume                 | 2319.1 (2)                      | 2319.1 (2)                        |
| Space group            | P 21/c                          | P 21/c                            |
| Hall group             | -P 2ybc                         | -P 2ybc                           |
| Moiety formula         | C21 H17 N3 O3 Si [+<br>solvent] | C21 H17 N3 O3 Si, C4 H8 O         |
| Sum formula            | C21 H17 N3 O3 Si [+<br>solvent] | C25 H25 N3 O4 Si                  |
| Mr                     | 387.47                          | 459.57                            |
| Dx, g cm <sup>-3</sup> | 1.110                           | 1.316                             |
| Z                      | 4                               | 4                                 |
| Mu (mm <sup>-1</sup> ) | 0.124                           | 0.138                             |
| F000                   | 808.0                           | 968.0                             |
| F000'                  | 808.65                          |                                   |
| h, k, lmax             | 16, 22, 15                      | 16, 22, 15                        |
| Nref                   | 5596                            | 5587                              |
| Tmin, Tmax             | 0.952, 0.980                    | 0.948, 0.985                      |
| Tmin'                  | 0.940                           |                                   |

Correction method= # Reported T Limits: Tmin=0.948 Tmax=0.985  
AbsCorr = INTEGRATION

Data completeness= 0.998

Theta(max)= 27.999

R(reflections)= 0.0425( 4030)

wR2(reflections)=  
0.1203( 5587)

S = 1.072

Npar= 253

---

The following ALERTS were generated. Each ALERT has the format

**test-name\_ALERT\_alert-type\_alert-level.**

Click on the hyperlinks for more details of the test.

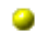

### Alert level C

|                   |                                                  |       |       |   |          |
|-------------------|--------------------------------------------------|-------|-------|---|----------|
| PLAT230_ALERT_2_C | Hirshfeld Test Diff for                          | Si1   | --C16 | . | 5.9 s.u. |
| PLAT910_ALERT_3_C | Missing # of FCF Reflection(s) Below Theta(Min). |       |       |   | 5 Note   |
| PLAT911_ALERT_3_C | Missing FCF Refl Between Thmin & STh/L=          | 0.600 |       |   | 5 Report |

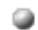

### Alert level G

FORMU01\_ALERT\_2\_G There is a discrepancy between the atom counts in the  
\_chemical\_formula\_sum and the formula from the \_atom\_site\* data.  
Atom count from \_chemical\_formula\_sum: C25 H25 N3 O4 Si1  
Atom count from the \_atom\_site data: C21 H17 N3 O3 Si1  
CELLZ01\_ALERT\_1\_G Difference between formula and atom\_site contents detected.  
CELLZ01\_ALERT\_1\_G ALERT: Large difference may be due to a  
symmetry error - see SYMMG tests  
From the CIF: \_cell\_formula\_units\_Z 4  
From the CIF: \_chemical\_formula\_sum C25 H25 N3 O4 Si  
TEST: Compare cell contents of formula and atom\_site data

| atom | Z*formula | cif sites | diff  |
|------|-----------|-----------|-------|
| C    | 100.00    | 84.00     | 16.00 |
| H    | 100.00    | 68.00     | 32.00 |
| N    | 12.00     | 12.00     | 0.00  |
| O    | 16.00     | 12.00     | 4.00  |
| Si   | 4.00      | 4.00      | 0.00  |

|                   |                                                  |                |              |
|-------------------|--------------------------------------------------|----------------|--------------|
| PLAT041_ALERT_1_G | Calc. and Reported SumFormula                    | Strings Differ | Please Check |
| PLAT066_ALERT_1_G | Predicted and Reported Tmin&Tmax Range           | Identical      | ? Check      |
| PLAT606_ALERT_4_G | Solvent Accessible VOID(S) in Structure          | .....          | ! Info       |
| PLAT869_ALERT_4_G | ALERTS Related to the Use of SQUEEZE             | Suppressed     | ! Info       |
| PLAT883_ALERT_1_G | No Info/Value for _atom_sites_solution_primary   | .              | Please Do !  |
| PLAT913_ALERT_3_G | Missing # of Very Strong Reflections in FCF      | ....           | 3 Note       |
| PLAT941_ALERT_3_G | Average HKL Measurement Multiplicity             | .....          | 2.8 Low      |
| PLAT961_ALERT_5_G | Dataset Contains no Negative Intensities         | .....          | Please Check |
| PLAT967_ALERT_5_G | Note: Two-Theta Cutoff Value in Embedded .res .. |                | 56.0 Degree  |
| PLAT978_ALERT_2_G | Number C-C Bonds with Positive Residual Density. |                | 2 Info       |

- 
- 0 **ALERT level A** = Most likely a serious problem - resolve or explain  
0 **ALERT level B** = A potentially serious problem, consider carefully  
3 **ALERT level C** = Check. Ensure it is not caused by an omission or oversight  
13 **ALERT level G** = General information/check it is not something unexpected

- 5 ALERT type 1 CIF construction/syntax error, inconsistent or missing data  
3 ALERT type 2 Indicator that the structure model may be wrong or deficient  
4 ALERT type 3 Indicator that the structure quality may be low  
2 ALERT type 4 Improvement, methodology, query or suggestion  
2 ALERT type 5 Informative message, check

---

## Datablock: jw1119\_01

---

Bond precision: C-C = 0.0026 A Wavelength=0.71073

Cell: a=12.2304(4) b=16.8989(4) c=11.3681(3)  
alpha=90 beta=101.160(2) gamma=90

Temperature: 180 K

|                        | Calculated                | Reported                  |
|------------------------|---------------------------|---------------------------|
| Volume                 | 2305.13(11)               | 2305.13(11)               |
| Space group            | P 21/c                    | P 21/c                    |
| Hall group             | -P 2ybc                   | -P 2ybc                   |
| Moiety formula         | C21 H17 N3 O3 Si, C H Cl3 | C21 H17 N3 O3 Si, C H Cl3 |
| Sum formula            | C22 H18 Cl3 N3 O3 Si      | C22 H18 Cl3 N3 O3 Si      |
| Mr                     | 506.71                    | 506.83                    |
| Dx, g cm <sup>-3</sup> | 1.460                     | 1.460                     |
| Z                      | 4                         | 4                         |
| Mu (mm <sup>-1</sup> ) | 0.479                     | 0.480                     |
| F000                   | 1039.8                    | 1040.0                    |
| F000'                  | 1042.22                   |                           |
| h, k, lmax             | 16, 22, 15                | 16, 22, 15                |
| Nref                   | 5568                      | 5563                      |
| Tmin, Tmax             | 0.817, 0.953              | 0.789, 0.957              |
| Tmin'                  | 0.806                     |                           |

Correction method= # Reported T Limits: Tmin=0.789 Tmax=0.957  
AbsCorr = INTEGRATION

Data completeness= 0.999 Theta(max)= 28.000

R(reflections)= 0.0420( 4539) wR2(reflections)=  
0.1059( 5563)

S = 1.053 Npar= 353

---

The following ALERTS were generated. Each ALERT has the format

**test-name\_ALERT\_alert-type\_alert-level.**

Click on the hyperlinks for more details of the test.

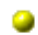

### Alert level C

|                                                                   |             |
|-------------------------------------------------------------------|-------------|
| PLAT906_ALERT_3_C Large K Value in the Analysis of Variance ..... | 4.015 Check |
| PLAT911_ALERT_3_C Missing FCF Refl Between Thmin & STh/L= 0.600   | 5 Report    |

---

## ● Alert level G

|                   |                                                  |        |        |
|-------------------|--------------------------------------------------|--------|--------|
| PLAT002_ALERT_2_G | Number of Distance or Angle Restraints on AtSite | 12     | Note   |
| PLAT068_ALERT_1_G | Reported F000 Differs from Calcd (or Missing)... | Please | Check  |
| PLAT171_ALERT_4_G | The CIF-Embedded .res File Contains EADP Records | 1      | Report |
| PLAT176_ALERT_4_G | The CIF-Embedded .res File Contains SADI Records | 2      | Report |
| PLAT302_ALERT_4_G | Anion/Solvent/Minor-Residue Disorder (Resd 2 )   | 100%   | Note   |
| PLAT302_ALERT_4_G | Anion/Solvent/Minor-Residue Disorder (Resd 3 )   | 100%   | Note   |
| PLAT302_ALERT_4_G | Anion/Solvent/Minor-Residue Disorder (Resd 4 )   | 100%   | Note   |
| PLAT304_ALERT_4_G | Non-Integer Number of Atoms in ..... (Resd 2 )   | 1.34   | Check  |
| PLAT304_ALERT_4_G | Non-Integer Number of Atoms in ..... (Resd 3 )   | 1.58   | Check  |
| PLAT304_ALERT_4_G | Non-Integer Number of Atoms in ..... (Resd 4 )   | 2.08   | Check  |
| PLAT860_ALERT_3_G | Number of Least-Squares Restraints .....         | 73     | Note   |
| PLAT883_ALERT_1_G | No Info/Value for _atom_sites_solution_primary . | Please | Do !   |
| PLAT913_ALERT_3_G | Missing # of Very Strong Reflections in FCF .... | 2      | Note   |
| PLAT941_ALERT_3_G | Average HKL Measurement Multiplicity .....       | 4.7    | Low    |
| PLAT961_ALERT_5_G | Dataset Contains no Negative Intensities .....   | Please | Check  |
| PLAT967_ALERT_5_G | Note: Two-Theta Cutoff Value in Embedded .res .. | 56.0   | Degree |
| PLAT978_ALERT_2_G | Number C-C Bonds with Positive Residual Density. | 8      | Info   |

---

0 **ALERT level A** = Most likely a serious problem - resolve or explain  
0 **ALERT level B** = A potentially serious problem, consider carefully  
2 **ALERT level C** = Check. Ensure it is not caused by an omission or oversight  
17 **ALERT level G** = General information/check it is not something unexpected

2 ALERT type 1 CIF construction/syntax error, inconsistent or missing data  
2 ALERT type 2 Indicator that the structure model may be wrong or deficient  
5 ALERT type 3 Indicator that the structure quality may be low  
8 ALERT type 4 Improvement, methodology, query or suggestion  
2 ALERT type 5 Informative message, check

---

## Datablock: jw1121\_01

---

Bond precision: C-C = 0.0031 A

Wavelength=0.71073

|              |                 |                |                 |
|--------------|-----------------|----------------|-----------------|
| Cell:        | a=9.7609(3)     | b=9.7775(3)    | c=9.8668(3)     |
|              | alpha=82.957(2) | beta=83.434(2) | gamma=86.564(2) |
| Temperature: | 180 K           |                |                 |

- ```

0 ALERT level A = Most likely a serious problem - resolve or explain
0 ALERT level B = A potentially serious problem, consider carefully
0 ALERT level C = Check. Ensure it is not caused by an omission or oversight
4 ALERT level G = General information/check it is not something unexpected

1 ALERT type 1 CIF construction/syntax error, inconsistent or missing data
1 ALERT type 2 Indicator that the structure model may be wrong or deficient
0 ALERT type 3 Indicator that the structure quality may be low
0 ALERT type 4 Improvement, methodology, query or suggestion
2 ALERT type 5 Informative message, check

```



---

0 **ALERT level A** = Most likely a serious problem - resolve or explain  
0 **ALERT level B** = A potentially serious problem, consider carefully  
0 **ALERT level C** = Check. Ensure it is not caused by an omission or oversight  
5 **ALERT level G** = General information/check it is not something unexpected

0 ALERT type 1 CIF construction/syntax error, inconsistent or missing data  
2 ALERT type 2 Indicator that the structure model may be wrong or deficient  
1 ALERT type 3 Indicator that the structure quality may be low  
0 ALERT type 4 Improvement, methodology, query or suggestion  
2 ALERT type 5 Informative message, check

---

## checkCIF publication errors

---

### **Alert level A**

PUBL004\_ALERT\_1\_A The contact author's name and address are missing,  
\_publ\_contact\_author\_name and \_publ\_contact\_author\_address.  
PUBL005\_ALERT\_1\_A \_publ\_contact\_author\_email, \_publ\_contact\_author\_fax and  
\_publ\_contact\_author\_phone are all missing.  
At least one of these should be present.  
PUBL006\_ALERT\_1\_A \_publ\_requested\_journal is missing  
e.g. 'Acta Crystallographica Section C'  
PUBL008\_ALERT\_1\_A \_publ\_section\_title is missing. Title of paper.  
PUBL009\_ALERT\_1\_A \_publ\_author\_name is missing. List of author(s) name(s).  
PUBL010\_ALERT\_1\_A \_publ\_author\_address is missing. Author(s) address(es).  
PUBL012\_ALERT\_1\_A \_publ\_section\_abstract is missing.  
Abstract of paper in English.

---

### **Alert level G**

PUBL017\_ALERT\_1\_G The \_publ\_section\_references section is missing or  
empty.

---

7 **ALERT level A** = Data missing that is essential or data in wrong format  
1 **ALERT level G** = General alerts. Data that may be required is missing

---

## Publication of your CIF

You should attempt to resolve as many as possible of the alerts in all categories. Often the minor alerts point to easily fixed oversights, errors and omissions in your CIF or refinement strategy, so attention to these fine details can be worthwhile. In order to resolve some of the more serious problems it may be necessary to carry out additional measurements or structure refinements. However, the nature of your study may justify the reported deviations from journal submission requirements and the more serious of these should be commented upon in the discussion or experimental section of a paper or in the "special\_details" fields of the CIF. *checkCIF* was carefully designed to identify outliers and unusual parameters, but every test has its limitations and alerts that are not important in a particular case may appear. Conversely, the absence of alerts does not guarantee there are no aspects of the results needing attention. It is up to the individual to critically assess their own results and, if necessary, seek expert advice.

If level A alerts remain, which you believe to be justified deviations, and you intend to submit this CIF for publication in a journal, you should additionally insert an explanation in your CIF using the Validation Reply Form (VRF) below. This will allow your explanation to be considered as part of the review process.

## Validation response form

Please find below a validation response form (VRF) that can be filled in and pasted into your CIF.

```
# start Validation Reply Form
_vrf_PUBL004_GLOBAL
;
PROBLEM: The contact author's name and address are missing,
RESPONSE: ...
;
_vrf_PUBL005_GLOBAL
;
PROBLEM: _publ_contact_author_email, _publ_contact_author_fax and
RESPONSE: ...
;
_vrf_PUBL006_GLOBAL
;
PROBLEM: _publ_requested_journal is missing
RESPONSE: ...
;
_vrf_PUBL008_GLOBAL
;
PROBLEM: _publ_section_title is missing. Title of paper.
RESPONSE: ...
;
_vrf_PUBL009_GLOBAL
;
PROBLEM: _publ_author_name is missing. List of author(s) name(s).
RESPONSE: ...
;
_vrf_PUBL010_GLOBAL
;
PROBLEM: _publ_author_address is missing. Author(s) address(es).
```



RESPONSE: ...

;

\_vrf\_PUBL012\_GLOBAL

;

PROBLEM: \_publ\_section\_abstract is missing.

RESPONSE: ...

;

# end Validation Reply Form

If you wish to submit your CIF for publication in Acta Crystallographica Section C or E, you should upload your CIF via the web. If you wish to submit your CIF for publication in IUCrData you should upload your CIF via the web. If your CIF is to form part of a submission to another IUCr journal, you will be asked, either during electronic submission or by the Co-editor handling your paper, to upload your CIF via our web site.

---

**PLATON version of 12/09/2022; check.def file version of 09/08/2022**

Datablock ab\_si\_002\_01\_sq\_sq - ellipsoid plot

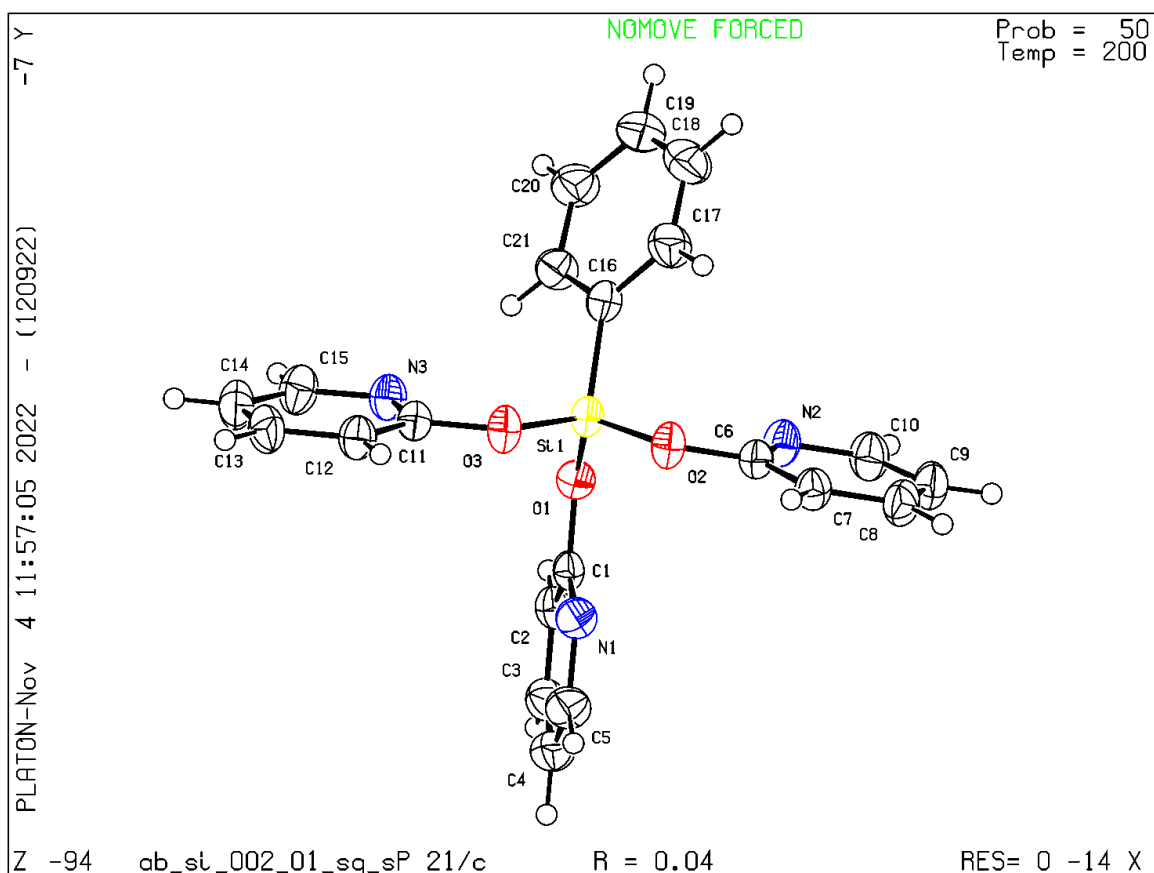

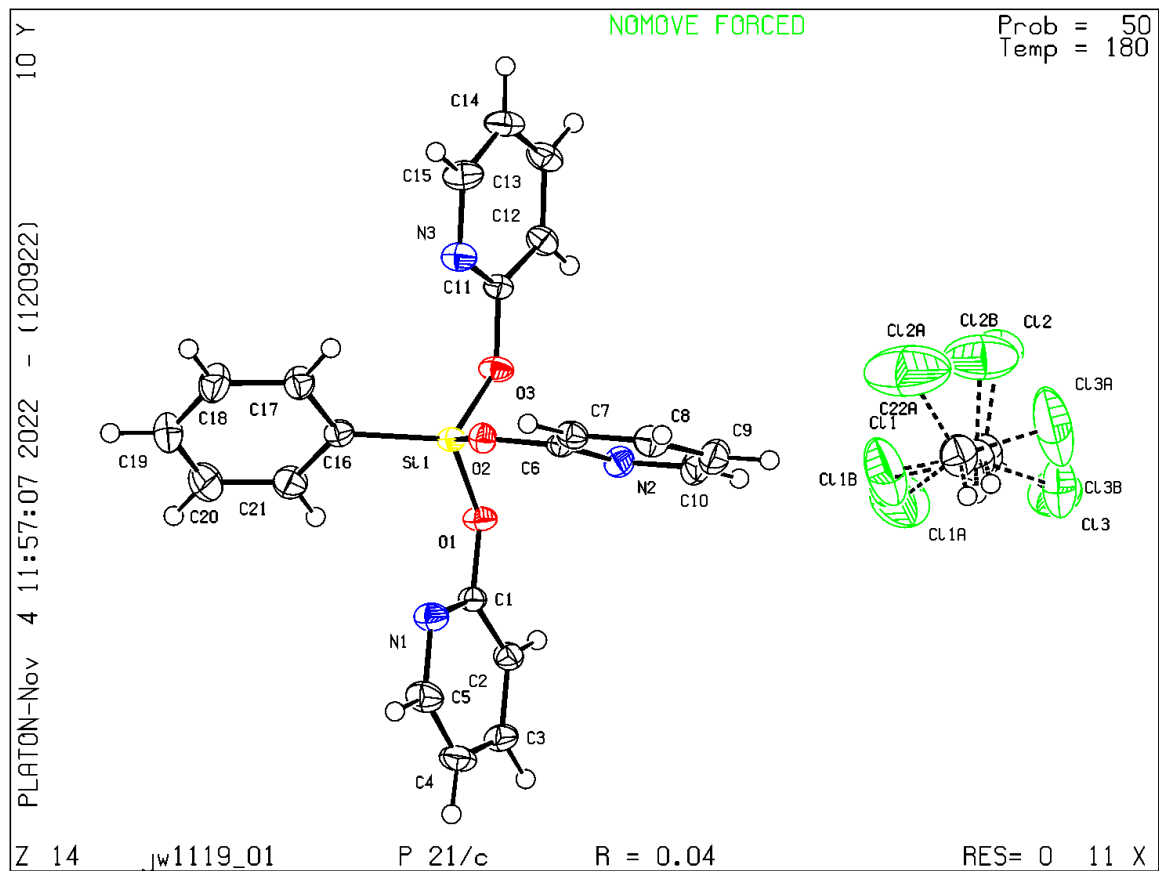

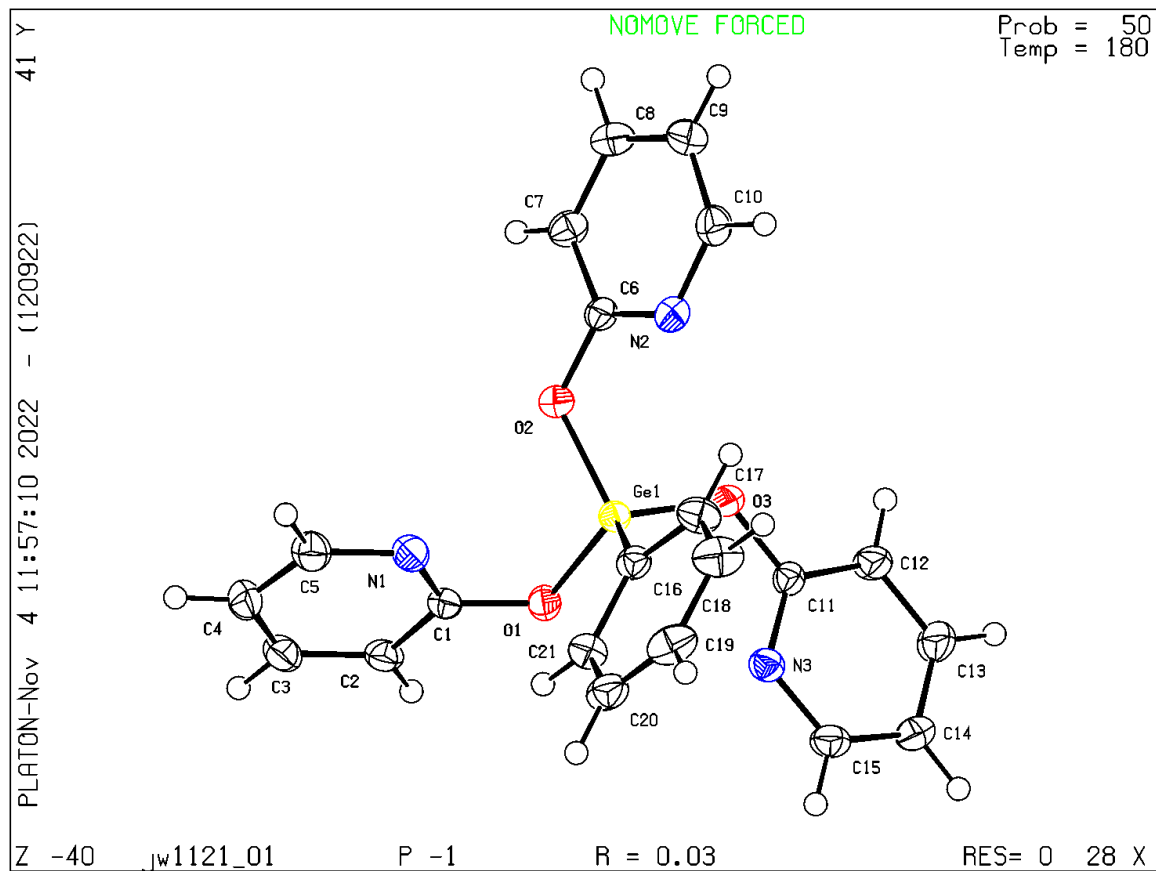

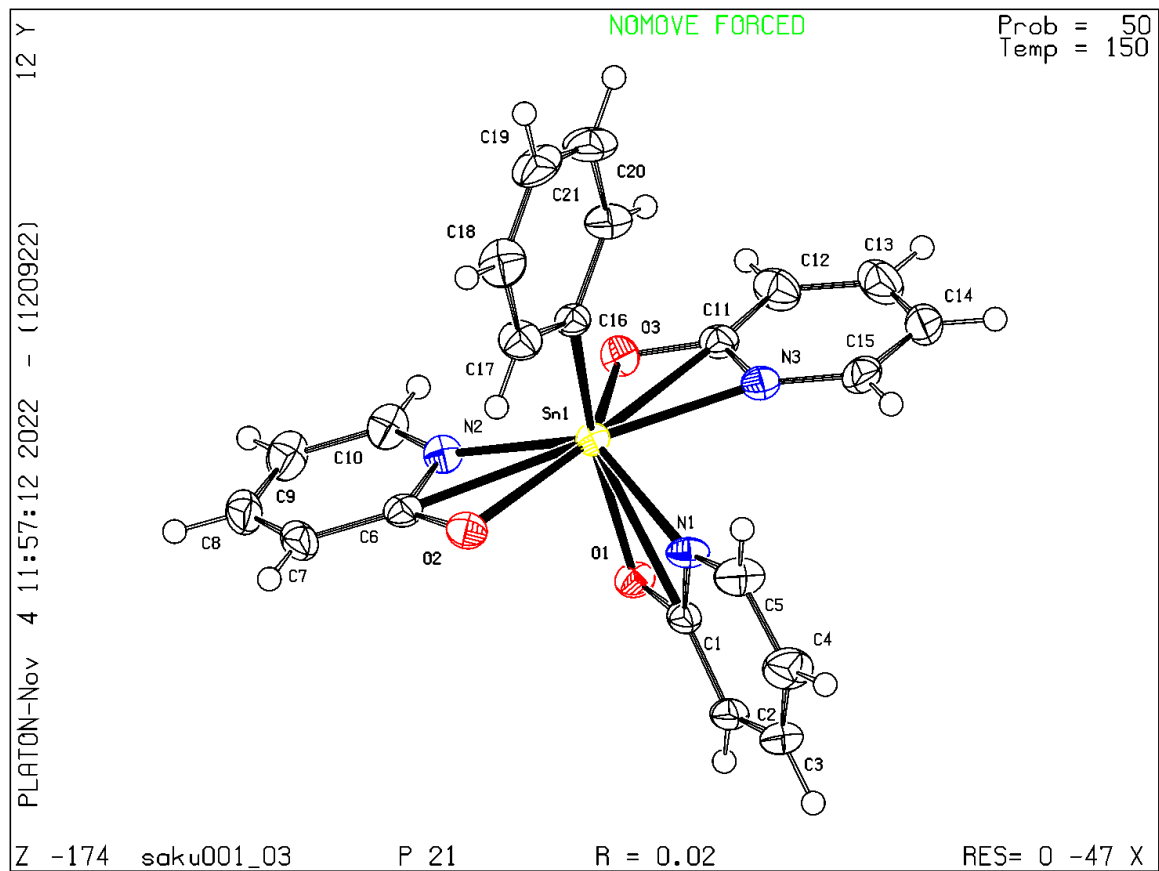

Supplement: s1 [file s1]
